# Supplementary material for: Fabrication of hybrid membranes by incorporating acid–base pair functionalized hollow mesoporous silica for enhanced proton conductivity
Source: Royal Society of Chemistry journal article supplement (doi:10.1039/c5ta03276h), 2015-01-01
Supplement: c5ta03276h1.pdf [file c5ta03276h1.pdf]

## **Electronic Supplementary Information for**

# **Fabrication of hybrid membranes by incorporating acid-base pairs functionalized hollow mesoporous silica for enhanced proton conductivity**

Yongheng Yin,<sup>ab</sup> Wanyu Deng,<sup>ab</sup> Hongyan Wang,<sup>ab</sup> Anping Li,<sup>ab</sup> Chongbin Wang,<sup>ab</sup> Zhongyi Jiang,<sup>ab</sup> Hong Wu<sup>\*abc</sup>

*<sup>a</sup>School of Chemical Engineering and Technology, Tianjin University, Tianjin 300072, China. E-mail: wuhong@tju.edu.cn; Fax: 86-22-23500086; Tel: 86-22-23500086*

*<sup>b</sup>Collaborative Innovation Center of Chemical Science and Engineering (Tianjin), Tianjin 300072, China*

*<sup>c</sup>Tianjin Key Laboratory of Membrane Science and Desalination Technology, Tianjin University, Tianjin 300072, China*

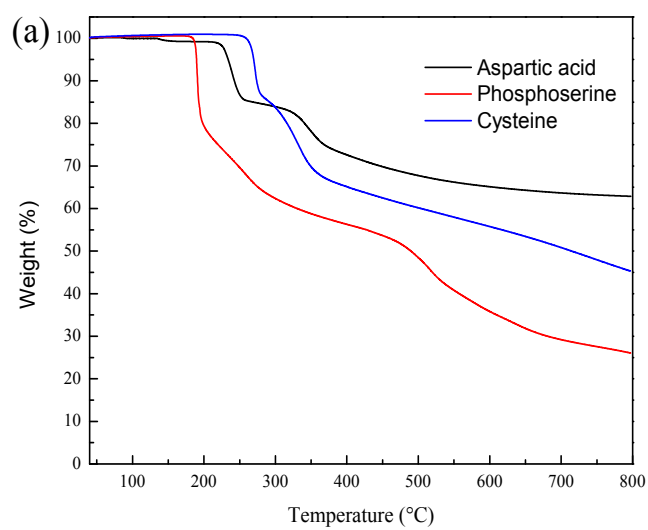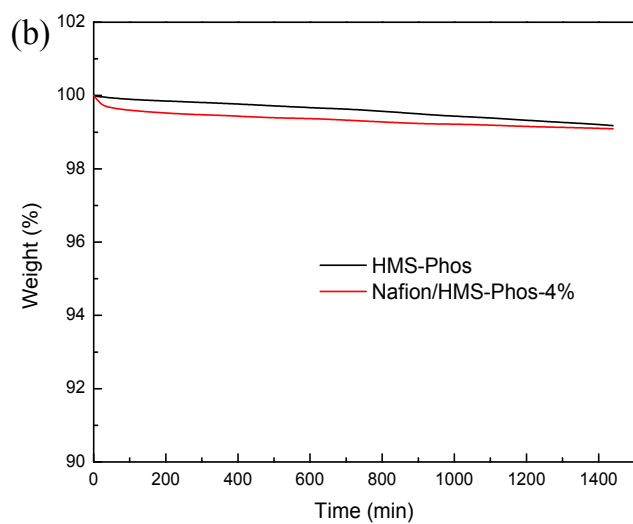

Fig. S1 TGA thermograms of (a) three kinds of amino acids; (b) HMS-Phos particles and Nafion/HMS-Phos-4% hybrid membrane.

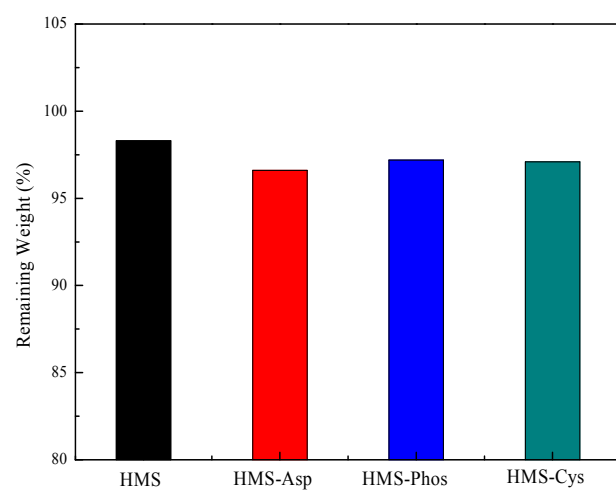

Fig. S2 The chemical stability of HMS and amino acid functionalized HMS under Fenton's test.

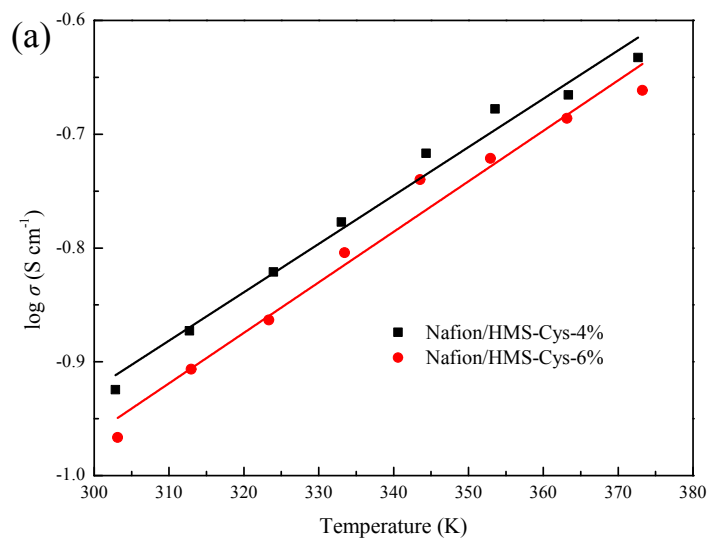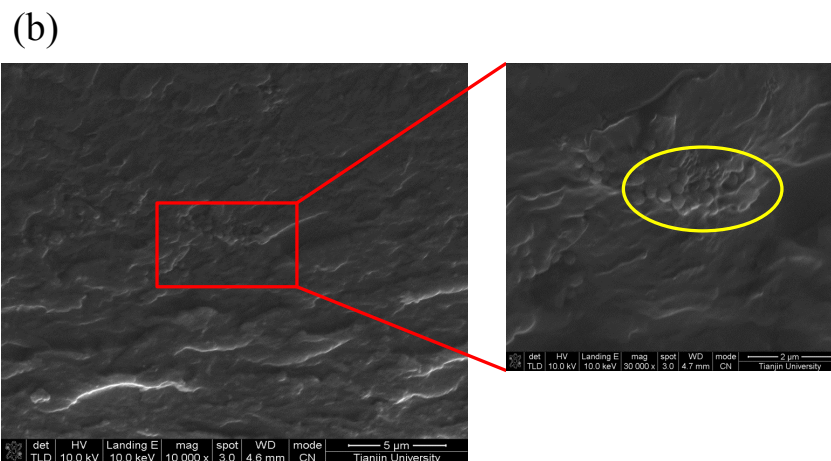

Fig. S3 (a) Proton conductivity of Nafion/HMS-Cys-4% and Nafion/HMS-Cys-6% hybrid membranes; (b) Cross-sectional SEM images of Nafion/HMS-Cys-6% hybrid membrane.

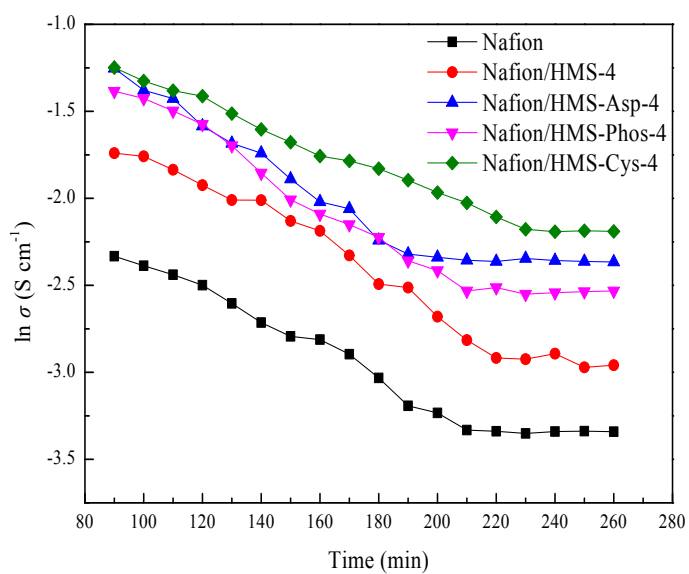

Fig. S4 Proton conductivity of hybrid membranes embedded with 4 wt% of HMS microspheres at 40°C and 20% RH after 90min.

Table S1 Typical proton conductivity of organic-inorganic hybrid membranes in literatures.

| Membrane                                                            | Temperature (°C) | Relative Humidity (%) | Proton conductivity (S cm <sup>-1</sup> ) | Reference |
|---------------------------------------------------------------------|------------------|-----------------------|-------------------------------------------|-----------|
| PEO/GO                                                              | 25               | 100                   | 0.086                                     | S1        |
| Nafion/<br>TiO <sub>2</sub> -RSO <sub>3</sub> H-10                  | 40               | 100                   | 0.036                                     | S2        |
| SiO <sub>2</sub> -SO <sub>3</sub> H/terpolymer/<br>poly(VDF-co-HFP) | 25               | 100                   | 0.021                                     | S3        |
| Nafion/S-ZrO <sub>2</sub>                                           | 80               | 50                    | 0.04                                      | S4        |
| PVDF/CSPTC/TEOS/<br>+PEG-c                                          | 120              | 50                    | 0.0206                                    | S5        |
| Nafion/Sulfopropylated<br>Polysilsesquioxane                        | 80               | 45                    | 0.018                                     | S6        |
| Nafion/Sulfopropylated<br>Polysilsesquioxane                        | 120              | 45                    | 0.022                                     | S6        |
| PFSA/sPOSS/PAA                                                      | 120              | 50                    | 0.107                                     | S7        |
| PFSA-aluminosilica                                                  | 80               | 50                    | 0.012                                     | S8        |
| PFSA-aluminosilica                                                  | 120              | 50                    | 0.026                                     | S8        |
| Nafion/F-GO                                                         | 80               | 40                    | 0.04                                      | S9        |
| Nafion/F-GO                                                         | 120              | 40                    | 0.09                                      | S9        |
| Nafion/phytic@MIL                                                   | 80               | 40                    | 0.018                                     | S10       |
| Nafion/PNT-5%                                                       | 80               | 40                    | 0.016                                     | S11       |
| Nafion/CS-SPION                                                     | 80               | 50                    | 0.06                                      | S12       |
| Nafion/S-Ph-PMO                                                     | 60               | 40                    | 0.0063                                    | S13       |
| SPES/silica                                                         | 120              | 50                    | 0.0018                                    | S14       |
| Nafion/HMS-Cys-4%                                                   | 30               | 100                   | 0.119                                     | This work |
| Nafion/HMS-Cys-4%                                                   | 80               | 51                    | 0.027                                     | This work |
| Nafion/HMS-Cys-4%                                                   | 120              | 51                    | 0.082                                     | This work |

References in Electronic Supplementary Information:

- [S1] Y. C. Cao, C. Xu, X. Wu, X. Wang, L. Xing and K. Scott, *J. Power Sources*, 2011, **196**, 8377.
- [S2] D. Cozzi, C. de Bonis, A. D'Epifanio, B. Mecheri, A. C. Tavares and S. Licoccia, *J. Power Sources*, 2014, **248**, 1127.
- [S3] O. Sel, A. Soulès, B. Améduri, B. Boutevin, C. Laberty-Robert, G. Gebel and C. Sanchez, *Adv. Funct. Mater.*, 2010, **20**, 1090.
- [S4] Y. Yao, Z. Lin, Y. Li, M. Alcoutlabi, H. Hamouda and X. Zhang, *Adv. Energy Mater.*, 2011, **1**, 1133.
- [S5] V. Maneeratana, J. D. Bass, T. Azaïs, A. Patissier, K. Vallé, M. Maréchal, G. Gebel, C. Laberty-Robert and C. Sanchez, *Adv. Funct. Mater.*, 2013, **23**, 2872.
- [S6] K. Xu, C. Chanthad, M. R. Gadinski, M. A. Hickner and Q. Wang, *ACS Appl. Mater. Interfaces*, 2009, **1**, 2573.
- [S7] J. Choi, R. Wycisk, W. Zhang, P. N. Pintauro, K. M. Lee and P. T. Mather, *ChemSusChem*, 2010, **3**, 1245.
- [S8] G. L. Athens, D. Kim, J. D. Epping, S. Cadars, Y. Ein-Eli and B. F. Chmelka, *J. Am. Chem. Soc.*, 2011, **133**, 16023.
- [S9] H. Zarrin, D. Higgins, Y. Jun, Z. Chen and M. Fowler, *J. Phys. Chem. C*, 2011, **115**, 20774.
- [S10] Z. Li, G. He, B. Zhang, Y. Cao, H. Wu, Z. Jiang and Z. Tiantian, *ACS Appl. Mater. Interfaces*, 2014, **6**, 9799.
- [S11] G. He, J. Zhao, S. Hu, L. Li, Z. Li, Y. Li, Z. Li, H. Wu, X. Yang and Z. Jiang, *ACS Appl. Mater. Interfaces*, 2014, **6**, 15291.
- [S12] E. Dashtimoghadam, J. J. VanDersarl, A. Bertsch, H. Moaddel, K. I. Jacob and P. Renaud, *ACS Appl. Mater. Interfaces*, 2014, **6**, 7099.
- [S13] N. C. Rosero-Navarro, E. M. Domingues, N. Sousa, P. Ferreira and F. M. Figueiredo, *Int. J. Hydrogen Energy*, 2014, **39**, 5338.
- [S14] N. N. Krishnan, D. Henkensmeier, J. H. Jang, H. J. Kim, V. Rebbin, I. H. Oh, S. A. Hong, S. K. Nam and T. H. Lim, *Int. J. Hydrogen Energy*, 2011, **36**, 7152.
